# Supplementary material for: Characteristics of complexes between poly(propylene imine) dendrimers and nucleotides
Source: Royal Society of Chemistry journal article supplement (doi:10.1039/c2nj40165g), 2012-01-01
Supplement: c2nj40165g.pdf [file c2nj40165g.pdf]

**Supplementary information:**

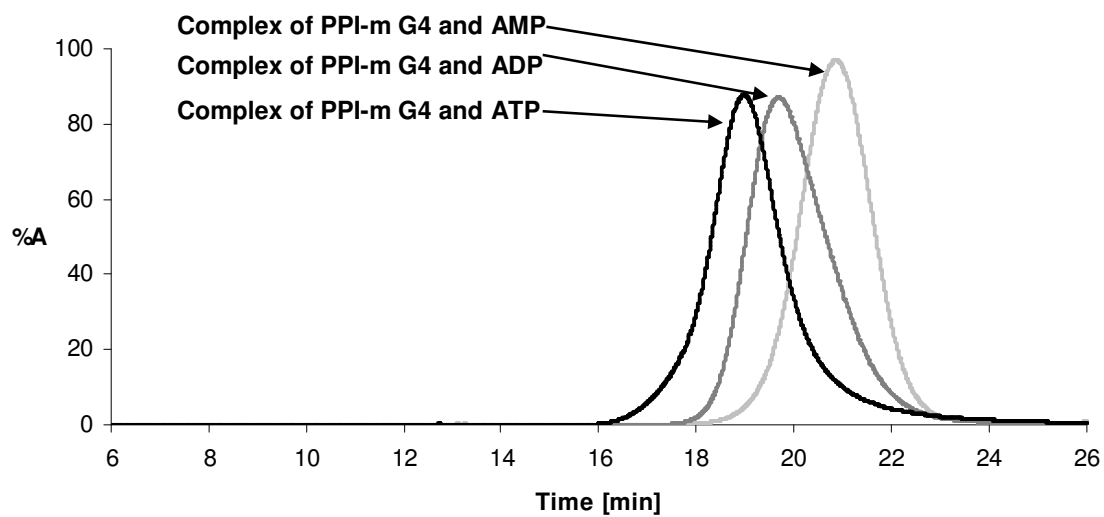

**Fig.1.**  
Chromatograms of separating of complexes PPI-m G4 dendrimer with ATP, ADP and AMP.  
(20 mmol/L HEPES buffer with 150 mmol/L NaCl, pH 7).

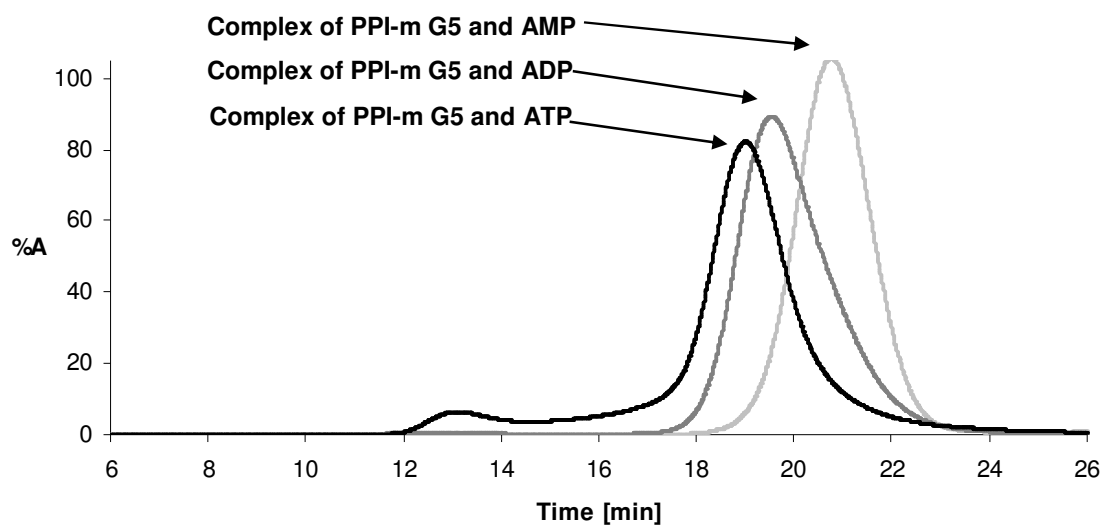

**Fig.2.**  
Chromatograms of separating of complexes PPI-m G5 dendrimer with ATP, ADP and AMP.  
(20 mmol/L HEPES buffer with 150 mmol/L NaCl, pH 7).
